# Supplementary material
Source: Research Square preprint supplement (doi:10.21203/rs.3.rs-9861226/v1)
Supplement: Supplementary file 1 [file dec3cdeed2a730b48c6b1f9a.docx]

# Supplementary information

**Table 1 | National overlap between current marine biodiversity hotspots, marine protected areas and cumulative human impacts, hotspot-MPA overlap, and human-impact means are computed on the common equal-area grid.**

| **Jurisdiction** | **EEZ area (million km²)** | **Current hotspot area (million km²)** | **Current hotspot (% EEZ)** | **Current MPA area (million km²)** | **Current MPA (% EEZ)** | **Current high/full MPA area (million km²)** | **Current high/full MPA (% EEZ)** | **Current hotspot area in MPA (million km²)** | **Current hotspot in MPA (%)** | **Mean current human impact in EEZ** | **Mean current human impact in hotspots** |
| --- | --- | --- | --- | --- | --- | --- | --- | --- | --- | --- | --- |
| Albania | 0.01 | 0.00 | 17.32 | 0.00 | 1.02 | 0.00 | 0.00 | 0.00 | 1.91 | 0.27 | 0.41 |
| Algeria | 0.13 | 0.00 | 3.28 | 0.00 | 0.02 | 0.00 | 0.00 | 0.00 | 0.00 | 0.34 | 0.58 |
| Angola | 0.50 | 0.26 | 52.66 | 0.01 | 1.84 | 0.00 | 0.00 | 0.01 | 2.87 | 0.29 | 0.33 |
| Antigua and Barbuda | 0.11 | 0.11 | 99.27 | 0.00 | 0.71 | 0.00 | 0.00 | 0.00 | 0.44 | 0.07 | 0.07 |
| Argentina | 1.07 | 0.78 | 72.70 | 0.08 | 7.42 | 0.01 | 0.68 | 0.00 | 0.56 | 0.36 | 0.36 |
| Australia | 9.00 | 4.13 | 45.91 | 4.63 | 51.48 | 1.80 | 19.99 | 1.69 | 40.98 | 0.18 | 0.16 |
| Bahamas | 0.62 | 0.60 | 97.32 | 0.04 | 6.94 | 0.00 | 0.09 | 0.04 | 6.98 | 0.15 | 0.15 |
| Bahrain | 0.01 | 0.01 | 85.54 | 0.00 | 17.74 | 0.00 | 0.00 | 0.00 | 20.73 | 0.13 | 0.10 |
| Bangladesh | 0.11 | 0.02 | 15.85 | 0.01 | 6.26 | 0.00 | 0.00 | 0.00 | 15.45 | 0.53 | 0.40 |
| Barbados | 0.19 | 0.08 | 42.79 | 0.00 | 0.04 | 0.00 | 0.00 | 0.00 | 0.09 | 0.07 | 0.07 |
| Belgium | 0.00 | 0.00 | 91.83 | 0.00 | 36.95 | 0.00 | 0.00 | 0.00 | 36.05 | 0.54 | 0.51 |
| Belize | 0.03 | 0.02 | 72.69 | 0.01 | 21.73 | 0.00 | 0.00 | 0.00 | 16.96 | 0.27 | 0.27 |
| Benin | 0.04 | 0.03 | 80.01 | 0.00 | 0.00 | 0.00 | 0.00 | 0.00 | 0.00 | 0.33 | 0.34 |
| Bosnia and Herzegovina | 0.00 | 0.00 | 0.00 | 0.00 | 1.48 | 0.00 | 0.00 | 0.00 |  | 0.58 |  |
| Brazil | 3.68 | 0.92 | 25.05 | 0.94 | 25.47 | 0.12 | 3.17 | 0.26 | 28.47 | 0.28 | 0.29 |
| Brunei | 0.04 | 0.01 | 25.49 | 0.00 | 0.36 | 0.00 | 0.00 | 0.00 | 0.00 | 0.46 | 0.46 |
| Bulgaria | 0.03 | 0.03 | 96.31 | 0.00 | 2.89 | 0.00 | 0.00 | 0.00 | 2.47 | 0.74 | 0.74 |
| Cambodia | 0.05 | 0.04 | 79.50 | 0.00 | 0.00 | 0.00 | 0.00 | 0.00 | 0.00 | 0.41 | 0.40 |
| Cameroon | 0.02 | 0.01 | 74.24 | 0.00 | 5.87 | 0.00 | 0.00 | 0.00 | 6.03 | 0.28 | 0.26 |
| Canada | 5.74 | 0.45 | 7.79 | 0.00 | 0.00 | 0.01 | 0.22 | 0.00 | 0.00 | 0.50 | 0.55 |
| Cape Verde | 0.80 | 0.59 | 73.29 | 0.00 | 0.04 | 0.00 | 0.00 | 0.00 | 0.01 | 0.22 | 0.22 |
| Chile | 3.67 | 1.04 | 28.27 | 1.50 | 40.97 | 0.30 | 8.15 | 0.50 | 47.72 | 0.34 | 0.36 |
| China | 1.30 | 0.67 | 51.51 | 0.00 | 0.12 | 0.00 | 0.00 | 0.00 | 0.19 | 0.49 | 0.56 |
| Colombia | 0.73 | 0.26 | 35.33 | 0.31 | 41.88 | 0.05 | 6.84 | 0.05 | 21.08 | 0.29 | 0.32 |
| Comores | 0.16 | 0.00 | 2.08 | 0.00 | 1.72 | 0.00 | 0.00 | 0.00 | 0.33 | 0.19 | 0.22 |
| Costa Rica | 0.59 | 0.24 | 40.10 | 0.17 | 28.36 | 0.06 | 9.68 | 0.08 | 33.24 | 0.33 | 0.36 |
| Croatia | 0.06 | 0.02 | 41.44 | 0.00 | 7.87 | 0.00 | 0.04 | 0.00 | 9.04 | 0.47 | 0.42 |
| Cuba | 0.35 | 0.26 | 74.38 | 0.01 | 1.95 | 0.00 | 0.54 | 0.01 | 2.07 | 0.24 | 0.22 |
| Cyprus | 0.10 | 0.00 | 0.00 | 0.01 | 8.51 | 0.00 | 0.00 | 0.00 |  | 0.32 |  |
| Democratic Republic of the Congo | 0.01 | 0.00 | 30.22 | 0.00 | 0.00 | 0.00 | 0.00 | 0.00 | 0.00 | 0.41 | 0.65 |
| Denmark | 2.62 | 0.14 | 5.28 | 0.02 | 0.89 | 0.00 | 0.00 | 0.02 | 12.18 | 0.44 | 0.49 |
| Djibouti | 0.01 | 0.00 | 59.04 | 0.00 | 0.54 | 0.00 | 0.00 | 0.00 | 0.50 | 0.78 | 0.78 |
| Dominica | 0.03 | 0.02 | 80.42 | 0.00 | 0.09 | 0.00 | 0.00 | 0.00 | 0.09 | 0.11 | 0.09 |
| Dominican Republic | 0.36 | 0.23 | 65.24 | 0.13 | 36.51 | 0.00 | 0.00 | 0.08 | 35.61 | 0.17 | 0.17 |
| East Timor | 0.08 | 0.04 | 49.78 | 0.00 | 0.73 | 0.00 | 0.00 | 0.00 | 0.55 | 0.22 | 0.31 |
| Ecuador | 1.09 | 0.39 | 36.32 | 0.21 | 19.26 | 0.17 | 15.50 | 0.17 | 41.83 | 0.26 | 0.29 |
| Egypt | 0.25 | 0.06 | 24.51 | 0.00 | 0.66 | 0.00 | 0.00 | 0.00 | 1.99 | 0.44 | 0.66 |
| El Salvador | 0.10 | 0.05 | 48.50 | 0.00 | 0.42 | 0.00 | 0.00 | 0.00 | 0.68 | 0.37 | 0.46 |
| Equatorial Guinea | 0.30 | 0.01 | 4.85 | 0.00 | 0.31 | 0.00 | 0.00 | 0.00 | 4.16 | 0.23 | 0.44 |
| Eritrea | 0.08 | 0.03 | 35.50 | 0.00 | 0.00 | 0.00 | 0.00 | 0.00 | 0.00 | 0.54 | 0.57 |
| Estonia | 0.04 | 0.02 | 52.88 | 0.01 | 17.63 | 0.00 | 0.00 | 0.00 | 19.60 | 0.37 | 0.37 |
| Federal Republic of Somalia | 0.82 | 0.26 | 31.93 | 0.00 | 0.00 | 0.00 | 0.00 | 0.00 | 0.00 | 0.20 | 0.22 |
| Fiji | 1.30 | 0.09 | 6.66 | 0.00 | 0.00 | 0.00 | 0.00 | 0.00 | 0.00 | 0.20 | 0.17 |
| Finland | 0.08 | 0.07 | 80.18 | 0.01 | 9.57 | 0.00 | 0.00 | 0.01 | 9.79 | 0.34 | 0.33 |
| France | 10.06 | 1.62 | 16.14 | 7.84 | 77.96 | 0.26 | 2.55 | 1.15 | 70.66 | 0.20 | 0.17 |
| Gabon | 0.20 | 0.04 | 19.55 | 0.05 | 24.91 | 0.00 | 0.00 | 0.01 | 31.43 | 0.36 | 0.55 |
| Gambia | 0.02 | 0.02 | 91.18 | 0.00 | 0.17 | 0.00 | 0.00 | 0.00 | 0.00 | 0.41 | 0.40 |
| Georgia | 0.02 | 0.02 | 94.33 | 0.00 | 0.00 | 0.00 | 0.00 | 0.00 | 0.00 | 0.68 | 0.68 |
| Germany | 0.06 | 0.05 | 85.73 | 0.02 | 43.28 | 0.00 | 0.00 | 0.02 | 40.89 | 0.46 | 0.43 |
| Ghana | 0.23 | 0.12 | 52.94 | 0.00 | 0.00 | 0.00 | 0.00 | 0.00 | 0.00 | 0.34 | 0.37 |
| Greece | 0.48 | 0.01 | 2.43 | 0.02 | 3.79 | 0.00 | 0.09 | 0.00 | 24.60 | 0.46 | 0.59 |
| Grenada | 0.03 | 0.01 | 57.98 | 0.00 | 0.79 | 0.00 | 0.00 | 0.00 | 0.88 | 0.26 | 0.23 |
| Guatemala | 0.11 | 0.04 | 36.72 | 0.00 | 0.06 | 0.00 | 0.00 | 0.00 | 0.17 | 0.35 | 0.46 |
| Guinea | 0.10 | 0.02 | 22.72 | 0.00 | 0.00 | 0.00 | 0.00 | 0.00 | 0.01 | 0.46 | 0.43 |
| Guinea-Bissau | 0.11 | 0.05 | 42.26 | 0.00 | 0.44 | 0.00 | 0.00 | 0.00 | 1.04 | 0.43 | 0.39 |
| Guyana | 0.14 | 0.03 | 21.02 | 0.00 | 0.00 | 0.00 | 0.00 | 0.00 | 0.00 | 0.22 | 0.24 |
| Haiti | 0.12 | 0.03 | 26.33 | 0.00 | 1.25 | 0.00 | 1.25 | 0.00 | 0.12 | 0.20 | 0.23 |
| Honduras | 0.21 | 0.10 | 46.82 | 0.02 | 8.56 | 0.00 | 0.00 | 0.01 | 14.15 | 0.23 | 0.22 |
| Iceland | 0.80 | 0.00 | 0.20 | 0.00 | 0.40 | 0.00 | 0.00 | 0.00 | 0.00 | 0.40 | 0.35 |
| India | 2.32 | 0.32 | 13.85 | 0.00 | 0.00 | 0.00 | 0.00 | 0.00 | 0.00 | 0.42 | 0.51 |
| Indonesia | 6.02 | 2.48 | 41.13 | 0.18 | 2.93 | 0.00 | 0.03 | 0.11 | 4.40 | 0.27 | 0.28 |
| Iran | 0.16 | 0.10 | 62.42 | 0.00 | 0.01 | 0.00 | 0.00 | 0.00 | 0.01 | 0.41 | 0.32 |
| Iraq | 0.00 | 0.00 | 81.38 | 0.00 | 0.00 | 0.00 | 0.00 | 0.00 | 0.00 | 0.28 | 0.24 |
| Ireland | 0.43 | 0.06 | 14.21 | 0.01 | 2.60 | 0.00 | 0.00 | 0.00 | 4.97 | 0.41 | 0.42 |
| Israel | 0.03 | 0.00 | 1.94 | 0.00 | 0.59 | 0.00 | 0.00 | 0.00 | 3.12 | 0.41 | 0.80 |
| Italy | 0.54 | 0.06 | 11.50 | 0.06 | 10.56 | 0.00 | 0.00 | 0.01 | 23.94 | 0.41 | 0.49 |
| Ivory Coast | 0.17 | 0.10 | 56.00 | 0.00 | 0.00 | 0.00 | 0.00 | 0.00 | 0.00 | 0.34 | 0.37 |
| Jamaica | 0.27 | 0.05 | 16.66 | 0.00 | 0.43 | 0.00 | 0.00 | 0.00 | 0.81 | 0.19 | 0.22 |
| Japan | 4.28 | 0.71 | 16.65 | 0.32 | 7.51 | 0.00 | 0.00 | 0.03 | 4.62 | 0.36 | 0.38 |
| Jordan | 0.00 | 0.00 | 82.92 | 0.00 | 3.08 | 0.00 | 0.00 | 0.00 | 3.72 | 0.69 | 0.68 |
| Kenya | 0.12 | 0.03 | 21.06 | 0.00 | 0.32 | 0.00 | 0.03 | 0.00 | 0.78 | 0.20 | 0.33 |
| Kiribati | 3.44 | 1.89 | 54.98 | 0.41 | 11.83 | 0.00 | 0.00 | 0.30 | 16.10 | 0.17 | 0.17 |
| Kuwait | 0.01 | 0.01 | 86.10 | 0.00 | 2.24 | 0.00 | 0.00 | 0.00 | 2.16 | 0.12 | 0.09 |
| Latvia | 0.03 | 0.01 | 52.99 | 0.00 | 15.41 | 0.00 | 0.00 | 0.00 | 20.28 | 0.38 | 0.35 |
| Lebanon | 0.02 | 0.00 | 0.94 | 0.00 | 0.23 | 0.00 | 0.00 | 0.00 | 0.00 | 0.35 | 0.57 |
| Liberia | 0.25 | 0.17 | 67.74 | 0.00 | 0.00 | 0.00 | 0.00 | 0.00 | 0.00 | 0.32 | 0.33 |
| Libya | 0.36 | 0.01 | 3.19 | 0.00 | 0.00 | 0.00 | 0.00 | 0.00 | 0.00 | 0.35 | 0.39 |
| Lithuania | 0.01 | 0.01 | 87.51 | 0.00 | 20.67 | 0.00 | 0.00 | 0.00 | 17.70 | 0.38 | 0.35 |
| Madagascar | 1.24 | 0.31 | 24.79 | 0.07 | 5.67 | 0.01 | 0.45 | 0.02 | 7.72 | 0.14 | 0.14 |
| Malaysia | 0.52 | 0.30 | 57.79 | 0.02 | 4.67 | 0.00 | 0.00 | 0.02 | 6.59 | 0.43 | 0.43 |
| Maldives | 0.92 | 0.13 | 14.12 | 0.00 | 0.07 | 0.00 | 0.00 | 0.00 | 0.38 | 0.16 | 0.16 |
| Malta | 0.05 | 0.00 | 0.65 | 0.00 | 7.81 | 0.00 | 0.00 | 0.00 | 67.53 | 0.35 | 0.38 |
| Marshall Islands | 2.00 | 1.03 | 51.53 | 0.06 | 2.76 | 0.00 | 0.17 | 0.05 | 4.67 | 0.13 | 0.13 |
| Mauritania | 0.17 | 0.02 | 12.53 | 0.00 | 0.00 | 0.00 | 0.00 | 0.00 | 0.00 | 0.38 | 0.41 |
| Mexico | 3.19 | 1.75 | 55.05 | 0.69 | 21.68 | 0.15 | 4.77 | 0.27 | 15.31 | 0.34 | 0.36 |
| Micronesia | 3.01 | 1.06 | 35.12 | 0.00 | 0.00 | 0.00 | 0.00 | 0.00 | 0.00 | 0.16 | 0.16 |
| Monaco | 0.00 | 0.00 | 0.00 | 0.00 | 99.99 | 0.00 | 0.00 | 0.00 |  | 0.30 |  |
| Montenegro | 0.01 | 0.00 | 16.82 | 0.00 | 0.88 | 0.00 | 0.00 | 0.00 | 1.07 | 0.50 | 0.56 |
| Morocco | 0.28 | 0.14 | 50.67 | 0.00 | 0.55 | 0.00 | 0.00 | 0.00 | 0.36 | 0.34 | 0.33 |
| Mozambique | 0.57 | 0.24 | 42.68 | 0.00 | 0.34 | 0.00 | 0.00 | 0.00 | 0.62 | 0.23 | 0.22 |
| Myanmar | 0.50 | 0.14 | 27.92 | 0.00 | 0.00 | 0.00 | 0.00 | 0.00 | 0.00 | 0.47 | 0.50 |
| Namibia | 0.56 | 0.46 | 81.90 | 0.01 | 1.69 | 0.00 | 0.02 | 0.01 | 1.65 | 0.35 | 0.34 |
| Nauru | 0.31 | 0.04 | 11.75 | 0.00 | 0.00 | 0.00 | 0.00 | 0.00 | 0.00 | 0.20 | 0.21 |
| Netherlands | 0.14 | 0.09 | 62.61 | 0.05 | 31.45 | 0.00 | 0.00 | 0.03 | 33.60 | 0.30 | 0.32 |
| New Zealand | 6.71 | 0.97 | 14.43 | 3.31 | 49.26 | 0.13 | 2.00 | 0.53 | 54.32 | 0.21 | 0.21 |
| Nicaragua | 0.21 | 0.11 | 53.50 | 0.03 | 14.39 | 0.00 | 0.02 | 0.01 | 9.04 | 0.31 | 0.35 |
| Nigeria | 0.18 | 0.09 | 51.14 | 0.00 | 0.00 | 0.00 | 0.00 | 0.00 | 0.00 | 0.40 | 0.45 |
| North Korea | 0.11 | 0.07 | 59.29 | 0.00 | 0.00 | 0.00 | 0.00 | 0.00 | 0.00 | 0.52 | 0.51 |
| Norway | 2.01 | 0.03 | 1.53 | 0.09 | 4.44 | 0.00 | 0.00 | 0.00 | 8.16 | 0.44 | 0.41 |
| Oman | 0.56 | 0.14 | 24.34 | 0.09 | 15.84 | 0.00 | 0.00 | 0.04 | 25.95 | 0.40 | 0.40 |
| Pakistan | 0.22 | 0.03 | 12.62 | 0.00 | 0.00 | 0.00 | 0.00 | 0.00 | 0.00 | 0.45 | 0.36 |
| Palau | 0.62 | 0.13 | 20.91 | 0.61 | 99.13 | 0.48 | 77.42 | 0.13 | 97.31 | 0.13 | 0.11 |
| Palestine | 0.00 | 0.00 | 6.20 | 0.00 | 0.00 | 0.00 | 0.00 | 0.00 | 0.00 | 0.54 | 0.78 |
| Panama | 0.33 | 0.17 | 52.10 | 0.16 | 48.88 | 0.07 | 20.45 | 0.05 | 27.05 | 0.36 | 0.44 |
| Papua New Guinea | 2.40 | 0.36 | 15.16 | 2.40 | 99.89 | 0.00 | 0.00 | 0.36 | 99.28 | 0.20 | 0.19 |
| Peru | 0.86 | 0.35 | 40.28 | 0.06 | 7.52 | 0.00 | 0.00 | 0.01 | 2.11 | 0.37 | 0.47 |
| Philippines | 1.97 | 0.46 | 23.19 | 0.06 | 3.10 | 0.00 | 0.06 | 0.04 | 8.03 | 0.33 | 0.39 |
| Poland | 0.03 | 0.02 | 77.50 | 0.01 | 21.23 | 0.00 | 0.00 | 0.01 | 22.37 | 0.42 | 0.41 |
| Portugal | 1.73 | 0.45 | 26.11 | 0.34 | 19.43 | 0.00 | 0.16 | 0.18 | 40.38 | 0.16 | 0.18 |
| Qatar | 0.03 | 0.03 | 94.78 | 0.00 | 0.00 | 0.00 | 0.00 | 0.00 | 0.00 | 0.15 | 0.14 |
| Republic of Mauritius | 1.93 | 0.40 | 20.69 | 0.00 | 0.00 | 0.00 | 0.00 | 0.00 | 0.00 | 0.09 | 0.09 |
| Republic of the Congo | 0.03 | 0.01 | 34.57 | 0.00 | 8.07 | 0.00 | 0.00 | 0.00 | 1.02 | 0.44 | 0.63 |
| Romania | 0.03 | 0.03 | 97.29 | 0.01 | 20.96 | 0.00 | 0.00 | 0.01 | 18.90 | 0.50 | 0.50 |
| Russia | 7.63 | 0.73 | 9.57 | 0.12 | 1.60 | 0.06 | 0.83 | 0.01 | 1.43 | 0.50 | 0.44 |
| Saint Kitts and Nevis | 0.01 | 0.01 | 96.14 | 0.00 | 4.51 | 0.00 | 0.00 | 0.00 | 1.87 | 0.07 | 0.07 |
| Saint Lucia | 0.02 | 0.01 | 56.41 | 0.00 | 2.39 | 0.00 | 0.00 | 0.00 | 1.22 | 0.23 | 0.18 |
| Saint Vincent and the Grenadines | 0.04 | 0.02 | 49.01 | 0.00 | 0.14 | 0.00 | 0.00 | 0.00 | 0.28 | 0.22 | 0.18 |
| Samoa | 0.13 | 0.00 | 2.99 | 0.04 | 27.32 | 0.03 | 25.51 | 0.00 | 38.80 | 0.22 | 0.24 |
| Sao Tome and Principe | 0.13 | 0.00 | 0.87 | 0.00 | 0.00 | 0.00 | 0.00 | 0.00 | 0.00 | 0.26 | 0.41 |
| Saudi Arabia | 0.22 | 0.17 | 77.09 | 0.01 | 2.31 | 0.00 | 0.00 | 0.00 | 1.85 | 0.60 | 0.63 |
| Senegal | 0.19 | 0.07 | 37.82 | 0.00 | 1.24 | 0.00 | 0.00 | 0.00 | 2.09 | 0.39 | 0.39 |
| Seychelles | 1.34 | 0.32 | 23.76 | 0.44 | 32.57 | 0.00 | 0.18 | 0.07 | 21.40 | 0.09 | 0.07 |
| Sierra Leone | 0.16 | 0.05 | 31.52 | 0.00 | 0.57 | 0.00 | 0.00 | 0.00 | 1.44 | 0.37 | 0.36 |
| Singapore | 0.00 | 0.00 | 60.24 | 0.00 | 0.00 | 0.00 | 0.00 | 0.00 | 0.00 | 0.58 | 0.52 |
| Slovenia | 0.00 | 0.00 | 67.17 | 0.00 | 0.38 | 0.00 | 0.00 | 0.00 | 0.57 | 0.39 | 0.41 |
| Solomon Islands | 1.60 | 0.08 | 4.86 | 1.60 | 100.00 | 0.00 | 0.01 | 0.08 | 100.00 | 0.17 | 0.15 |
| South Africa | 1.55 | 0.73 | 47.10 | 0.23 | 14.70 | 0.07 | 4.31 | 0.08 | 10.67 | 0.22 | 0.23 |
| South Korea | 0.43 | 0.30 | 69.95 | 0.00 | 0.72 | 0.00 | 0.00 | 0.00 | 0.51 | 0.49 | 0.49 |
| Spain | 1.01 | 0.10 | 9.63 | 0.23 | 22.34 | 0.00 | 0.00 | 0.04 | 40.66 | 0.30 | 0.36 |
| Sri Lanka | 0.53 | 0.22 | 40.53 | 0.00 | 0.22 | 0.00 | 0.00 | 0.00 | 0.42 | 0.31 | 0.33 |
| Sudan | 0.08 | 0.07 | 81.48 | 0.00 | 0.00 | 0.00 | 0.00 | 0.00 | 0.00 | 0.68 | 0.72 |
| Suriname | 0.13 | 0.03 | 19.17 | 0.00 | 0.00 | 0.00 | 0.00 | 0.00 | 0.00 | 0.27 | 0.28 |
| Sweden | 0.16 | 0.07 | 46.19 | 0.02 | 13.85 | 0.00 | 0.00 | 0.01 | 11.95 | 0.37 | 0.35 |
| Syria | 0.01 | 0.00 | 0.36 | 0.00 | 0.00 | 0.00 | 0.00 | 0.00 | 0.00 | 0.43 | 0.64 |
| São Tomé and Principe | 0.03 | 0.00 | 1.28 | 0.00 | 0.00 | 0.00 | 0.00 | 0.00 | 0.00 | 0.31 | 0.33 |
| Taiwan | 0.43 | 0.25 | 58.93 | 0.00 | 0.83 | 0.00 | 0.00 | 0.00 | 1.25 | 0.35 | 0.37 |
| Tanzania | 0.24 | 0.03 | 14.40 | 0.01 | 2.69 | 0.00 | 0.01 | 0.00 | 12.85 | 0.16 | 0.26 |
| Thailand | 0.30 | 0.19 | 62.27 | 0.01 | 2.37 | 0.00 | 0.00 | 0.00 | 1.60 | 0.51 | 0.49 |
| Togo | 0.02 | 0.01 | 72.82 | 0.00 | 0.00 | 0.00 | 0.00 | 0.00 | 0.00 | 0.33 | 0.34 |
| Tonga | 0.67 | 0.05 | 6.92 | 0.00 | 0.05 | 0.00 | 0.00 | 0.00 | 0.49 | 0.16 | 0.15 |
| Trinidad and Tobago | 0.08 | 0.04 | 47.47 | 0.00 | 0.00 | 0.00 | 0.00 | 0.00 | 0.00 | 0.22 | 0.23 |
| Tunisia | 0.10 | 0.05 | 47.57 | 0.00 | 0.60 | 0.00 | 0.00 | 0.00 | 0.68 | 0.42 | 0.42 |
| Turkey | 0.26 | 0.17 | 65.54 | 0.00 | 0.00 | 0.00 | 0.00 | 0.00 | 0.00 | 0.66 | 0.70 |
| Tuvalu | 0.75 | 0.06 | 8.34 | 0.00 | 0.03 | 0.00 | 0.00 | 0.00 | 0.07 | 0.17 | 0.17 |
| Ukraine | 0.14 | 0.13 | 92.80 | 0.02 | 16.26 | 0.00 | 0.00 | 0.02 | 15.27 | 0.53 | 0.53 |
| United Arab Emirates | 0.06 | 0.05 | 85.50 | 0.00 | 3.92 | 0.00 | 0.00 | 0.00 | 3.79 | 0.16 | 0.14 |
| United Kingdom | 5.88 | 1.36 | 23.13 | 4.05 | 68.98 | 2.51 | 42.75 | 0.44 | 32.56 | 0.24 | 0.18 |
| United States | 12.17 | 5.23 | 43.00 | 3.21 | 26.36 | 3.07 | 25.24 | 1.53 | 29.15 | 0.36 | 0.33 |
| Uruguay | 0.16 | 0.10 | 63.68 | 0.00 | 0.05 | 0.00 | 0.02 | 0.00 | 0.04 | 0.30 | 0.29 |
| Vanuatu | 0.63 | 0.03 | 5.04 | 0.63 | 100.00 | 0.00 | 0.04 | 0.03 | 100.00 | 0.22 | 0.17 |
| Venezuela | 0.47 | 0.19 | 39.47 | 0.00 | 0.84 | 0.00 | 0.00 | 0.00 | 1.23 | 0.26 | 0.28 |
| Vietnam | 0.75 | 0.30 | 39.88 | 0.00 | 0.26 | 0.00 | 0.00 | 0.00 | 0.35 | 0.38 | 0.39 |
| Western Sahara | 0.28 | 0.13 | 45.67 | 0.00 | 0.06 | 0.00 | 0.00 | 0.00 | 0.00 | 0.37 | 0.43 |
| Yemen | 0.53 | 0.09 | 17.23 | 0.00 | 0.10 | 0.00 | 0.00 | 0.00 | 0.46 | 0.40 | 0.49 |

**Table 2. | High-seas overlap between current marine biodiversity hotspots, marine protected areas and cumulative human impacts, hotspot-MPA overlap, and human-impact means are computed on the common equal-area grid.**

| **High Seas of the** | **EEZ area (million km²)** | **Current hotspot area (million km²)** | **Current hotspot (% EEZ)** | **Current MPA area (million km²)** | **Current MPA (% EEZ)** | **Current high/full MPA area (million km²)** | **Current high/full MPA (% EEZ)** | **Current hotspot area in MPA (million km²)** | **Current hotspot in MPA (%)** | **Mean current human impact in EEZ** | **Mean current human impact in hotspots** |
| --- | --- | --- | --- | --- | --- | --- | --- | --- | --- | --- | --- |
| Arabian Sea | 2.05 | 0.05 | 2.31 | 0.00 | 0.00 | 0.00 | 0.00 | 0.00 | 0.00 | 0.15 | 0.16 |
| Arctic Ocean | 2.71 | 0.37 | 13.53 | 0.00 | 0.01 | 0.00 | 0.00 | 0.00 | 0.00 | 0.66 | 0.74 |
| Barentsz Sea | 0.07 | 0.06 | 75.54 | 0.00 | 0.00 | 0.00 | 0.00 | 0.00 | 0.00 | 0.46 | 0.45 |
| Bay of Bengal | 0.65 | 0.02 | 3.76 | 0.00 | 0.00 | 0.00 | 0.00 | 0.00 | 0.00 | 0.19 | 0.21 |
| Beaufort Sea | 0.01 | 0.01 | 100.00 | 0.00 | 0.00 | 0.00 | 0.00 | 0.00 | 0.00 | 0.80 | 0.80 |
| Bering Sea | 0.19 | 0.02 | 12.53 | 0.00 | 0.00 | 0.00 | 0.00 | 0.00 | 0.00 | 0.45 | 0.42 |
| Coral Sea | 0.11 | 0.09 | 89.73 | 0.00 | 0.02 | 0.00 | 0.01 | 0.00 | 0.02 | 0.17 | 0.17 |
| Davis Strait | 0.01 | 0.00 | 0.00 | 0.00 | 0.00 | 0.00 | 0.00 | 0.00 |  | 0.28 |  |
| East Siberian Sea | 0.01 | 0.00 | 0.00 | 0.00 | 0.00 | 0.00 | 0.00 | 0.00 |  | 0.25 |  |
| Great Australian Bight | 0.23 | 0.01 | 4.16 | 0.00 | 0.00 | 0.00 | 0.00 | 0.00 | 0.00 | 0.27 | 0.24 |
| Greenland Sea | 0.07 | 0.01 | 13.96 | 0.00 | 0.00 | 0.00 | 0.00 | 0.00 | 0.00 | 0.32 | 0.32 |
| Gulf of Guinea | 0.04 | 0.00 | 1.94 | 0.00 | 0.00 | 0.00 | 0.00 | 0.00 | 0.00 | 0.19 | 0.18 |
| Gulf of Mexico | 0.04 | 0.04 | 100.00 | 0.00 | 0.00 | 0.00 | 0.00 | 0.00 | 0.00 | 0.15 | 0.15 |
| Indian Ocean | 43.92 | 4.24 | 9.65 | 0.03 | 0.07 | 0.00 | 0.01 | 0.01 | 0.12 | 0.19 | 0.14 |
| Labrador Sea | 0.15 | 0.00 | 0.32 | 0.00 | 0.71 | 0.00 | 0.00 | 0.00 | 0.00 | 0.29 | 0.31 |
| Laccadive Sea | 0.01 | 0.00 | 8.61 | 0.00 | 0.00 | 0.00 | 0.00 | 0.00 | 0.00 | 0.14 | 0.15 |
| Mozambique Channel | 0.01 | 0.01 | 100.00 | 0.00 | 0.00 | 0.00 | 0.00 | 0.00 | 0.00 | 0.10 | 0.10 |
| North Atlantic Ocean | 22.65 | 12.66 | 55.86 | 1.63 | 7.19 | 0.00 | 0.00 | 0.71 | 5.58 | 0.17 | 0.16 |
| North Pacific Ocean | 44.24 | 21.03 | 47.53 | 0.00 | 0.00 | 0.00 | 0.00 | 0.00 | 0.00 | 0.19 | 0.19 |
| Norwegian Sea | 0.25 | 0.12 | 50.43 | 0.00 | 0.00 | 0.00 | 0.00 | 0.00 | 0.00 | 0.42 | 0.47 |
| Philippine Sea | 1.57 | 0.48 | 30.88 | 0.00 | 0.00 | 0.00 | 0.00 | 0.00 | 0.00 | 0.14 | 0.12 |
| Sea of Okhotsk | 0.05 | 0.05 | 98.75 | 0.00 | 0.00 | 0.00 | 0.00 | 0.00 | 0.00 | 0.68 | 0.68 |
| South Atlantic Ocean | 30.93 | 5.35 | 17.31 | 0.01 | 0.02 | 0.00 | 0.00 | 0.00 | 0.04 | 0.17 | 0.15 |
| South Pacific Ocean | 49.19 | 7.86 | 15.98 | 0.04 | 0.09 | 0.00 | 0.00 | 0.01 | 0.12 | 0.20 | 0.17 |
| Southern Ocean | 21.63 | 3.85 | 17.78 | 2.09 | 9.64 | 1.98 | 9.13 | 0.60 | 15.65 | 0.34 | 0.36 |
| Tasman Sea | 1.59 | 0.53 | 33.04 | 0.00 | 0.01 | 0.00 | 0.00 | 0.00 | 0.00 | 0.16 | 0.15 |
